# Supplementary material
Source: JCI journal article supplement (doi:10.1172/jci.insight.42933)
Supplement: sd1 [file 1]

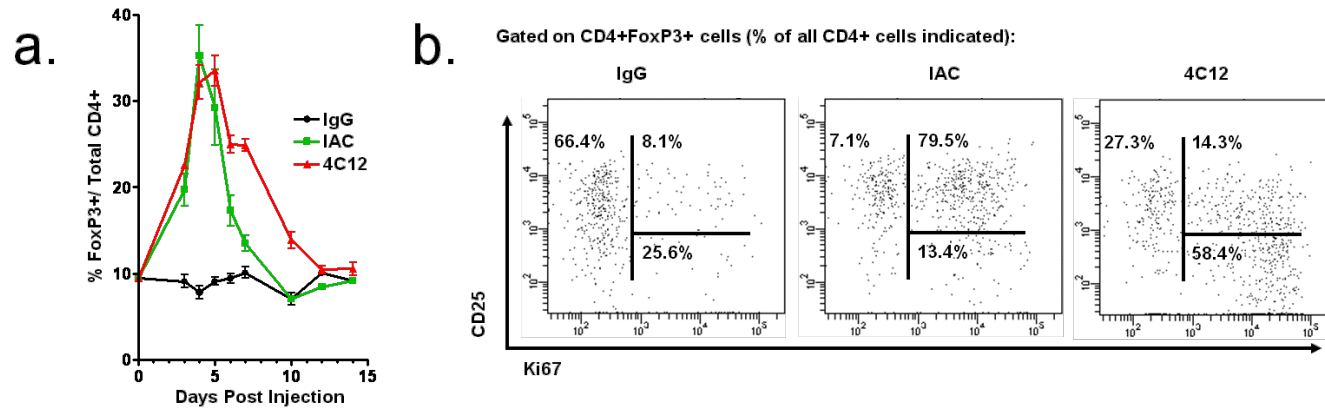

Supplemental Figure 1: Comparison of Treg expanded by treatment with 4C12 or recombinant IL-2/anti-IL-2 antibody complex (IAC). **a)** FIR mice were treated with 4C12 (10  $\mu$ g) on day 0 or with a series of three injections with IAC on days 0-2. The proportion of FoxP3+ cells within the CD4+ T cell population was measured in the peripheral blood daily by flow cytometry. **b)** Splenocytes were isolated from FIR mice 4 on day 4 after treatment with IAC, 4C12 or isotype control IgG. The proportion of CD4+FoxP3+ cells expressing CD25 and the proliferation marker Ki67 are shown.

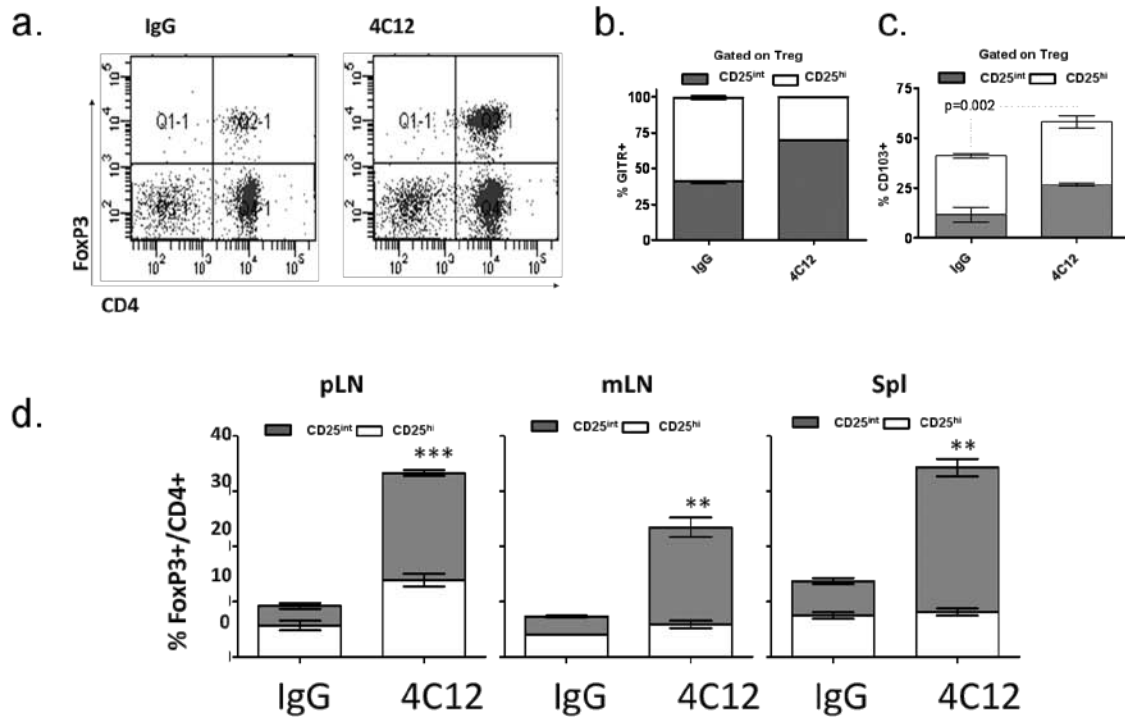

Supplemental Figure 2: 4C12 treatment induces Treg expansion in all tissues analyzed. **a)** An example of a typical flow cytometry dot plot staining for CD4 and FoxP3 (RFP). CD4<sup>+</sup>FoxP3<sup>+</sup> cells from quadrant Q2-1 were gated for subsequent analysis of CD25<sup>hi</sup> and CD25<sup>int</sup> cells as shown in **(b-d)**. **(b)** The ratio of GITR and **(c)** CD103 expression among CD25<sup>hi</sup> versus CD25<sup>int</sup> Treg in splenocytes 4 days after the indicated treatment. **(d)** Data are represented as mean  $\pm$  SEM from over 8 independent experiments with at least 3 mice per group per experiment. Paired analysis was performed using the students T-test. \*\* indicates  $p < 0.01$  and \*\*\* indicates  $p < 0.001$ .

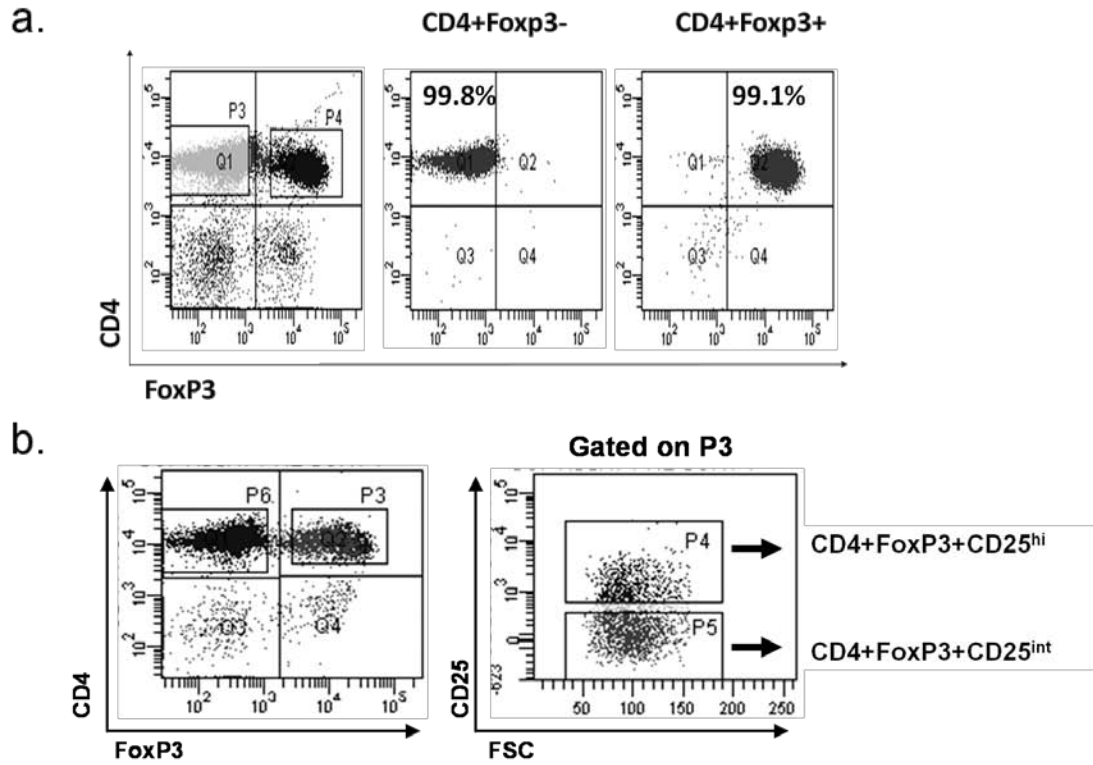

Supplemental Figure 3: Example of sorting strategy and results. **a)** Splenocytes were harvested from FIR mice, enriched for CD4+ T cells and sorted on the basis of CD4+ and FoxP3+ (RFP). The left panel illustrates a typical CD4-enriched population of splenocytes. The middle and right panels illustrate representative post-sort analysis for CD4+FoxP3- (P3 gate) and CD4+FoxP3+ (P4 gate) populations. **b)** For some experiments CD4+FoxP3+ cells (gate P3) were sorted based on CD25 expression. Representative plots are shown demonstrating the gating strategy for CD25<sup>hi</sup> and CD25<sup>int</sup> sorting.

| Condition                                                       | Splenocytes | CD4+ | LN |
|-----------------------------------------------------------------|-------------|------|----|
| 1. Unstim.                                                      | X           | X    | X  |
| 2. Unstim. + 4C12                                               | X           | X    | X  |
| 3. Unstim + 4C12 crossl.                                        | X           |      |    |
| 4. $\alpha$ -CD3                                                | X           | X    | X  |
| 5. $\alpha$ -CD3 + 4C12                                         | X           | X    | X  |
| 6. $\alpha$ -CD3 + 4C12 crossl.                                 | X           |      |    |
| 7. $\alpha$ -CD3 + TGF- $\beta$                                 | X           | X    | X  |
| 8. $\alpha$ -CD3 + TGF- $\beta$ + 4C12                          | X           | X    | X  |
| 9. $\alpha$ -CD3 + RA                                           | X           |      |    |
| 10. $\alpha$ -CD3 + RA + 4C12                                   | X           |      |    |
| 11. $\alpha$ -CD3 + RA + 4C12 crossl.                           | X           |      |    |
| 12. $\alpha$ -CD3 + $\alpha$ -CD28                              | X           | X    | X  |
| 13. $\alpha$ -CD3 + $\alpha$ -CD28 + 4C12                       | X           | X    | X  |
| 14. $\alpha$ -CD3 + IL-2                                        | X           | X    | X  |
| 15. $\alpha$ -CD3 + IL-2 + 4C12                                 | X           | X    | x  |
| 16. $\alpha$ -CD3 + $\alpha$ -CD28 + IL-2                       | X           |      |    |
| 17. $\alpha$ -CD3 + $\alpha$ -CD28 + IL-2 + 4C12                | X           |      |    |
| 18. $\alpha$ -CD3 + $\alpha$ -CD28 + TGF- $\beta$               | X           |      |    |
| 19. $\alpha$ -CD3 + $\alpha$ -CD28 + TGF- $\beta$ + 4C12        | X           |      |    |
| 20. $\alpha$ -CD3 + IL-2 + TGF- $\beta$                         | X           |      |    |
| 21. $\alpha$ -CD3 + IL-2 + TGF- $\beta$ + 4C12                  | X           |      |    |
| 22. $\alpha$ -CD3 + $\alpha$ -CD28 + IL-2 + TGF- $\beta$        | X           |      |    |
| 23. $\alpha$ -CD3 + $\alpha$ -CD28 + IL-2 + TGF- $\beta$ + 4C12 | X           |      |    |
| 24. One day in vivo + 4 days in vitro: IL-2 + 4C12 titration    | x           |      |    |

Supplemental Table 1: Conditions tested *in vitro* using various purified lymphocyte populations (indicated) to examine requirements for TNFR25 induced Treg proliferation.
